# Supplementary material for: Hypertonicity induces mitochondrial extracellular vesicles (MEVs) that activate TNF-α and β-catenin signaling to promote adipocyte dedifferentiation
Source: Springer Nature journal article supplement (doi:10.1186/s13287-023-03558-3), 2023-12-19
Supplement: MOESM1 [file 13287_2023_3558_MOESM1_ESM.pdf]

Figure 2

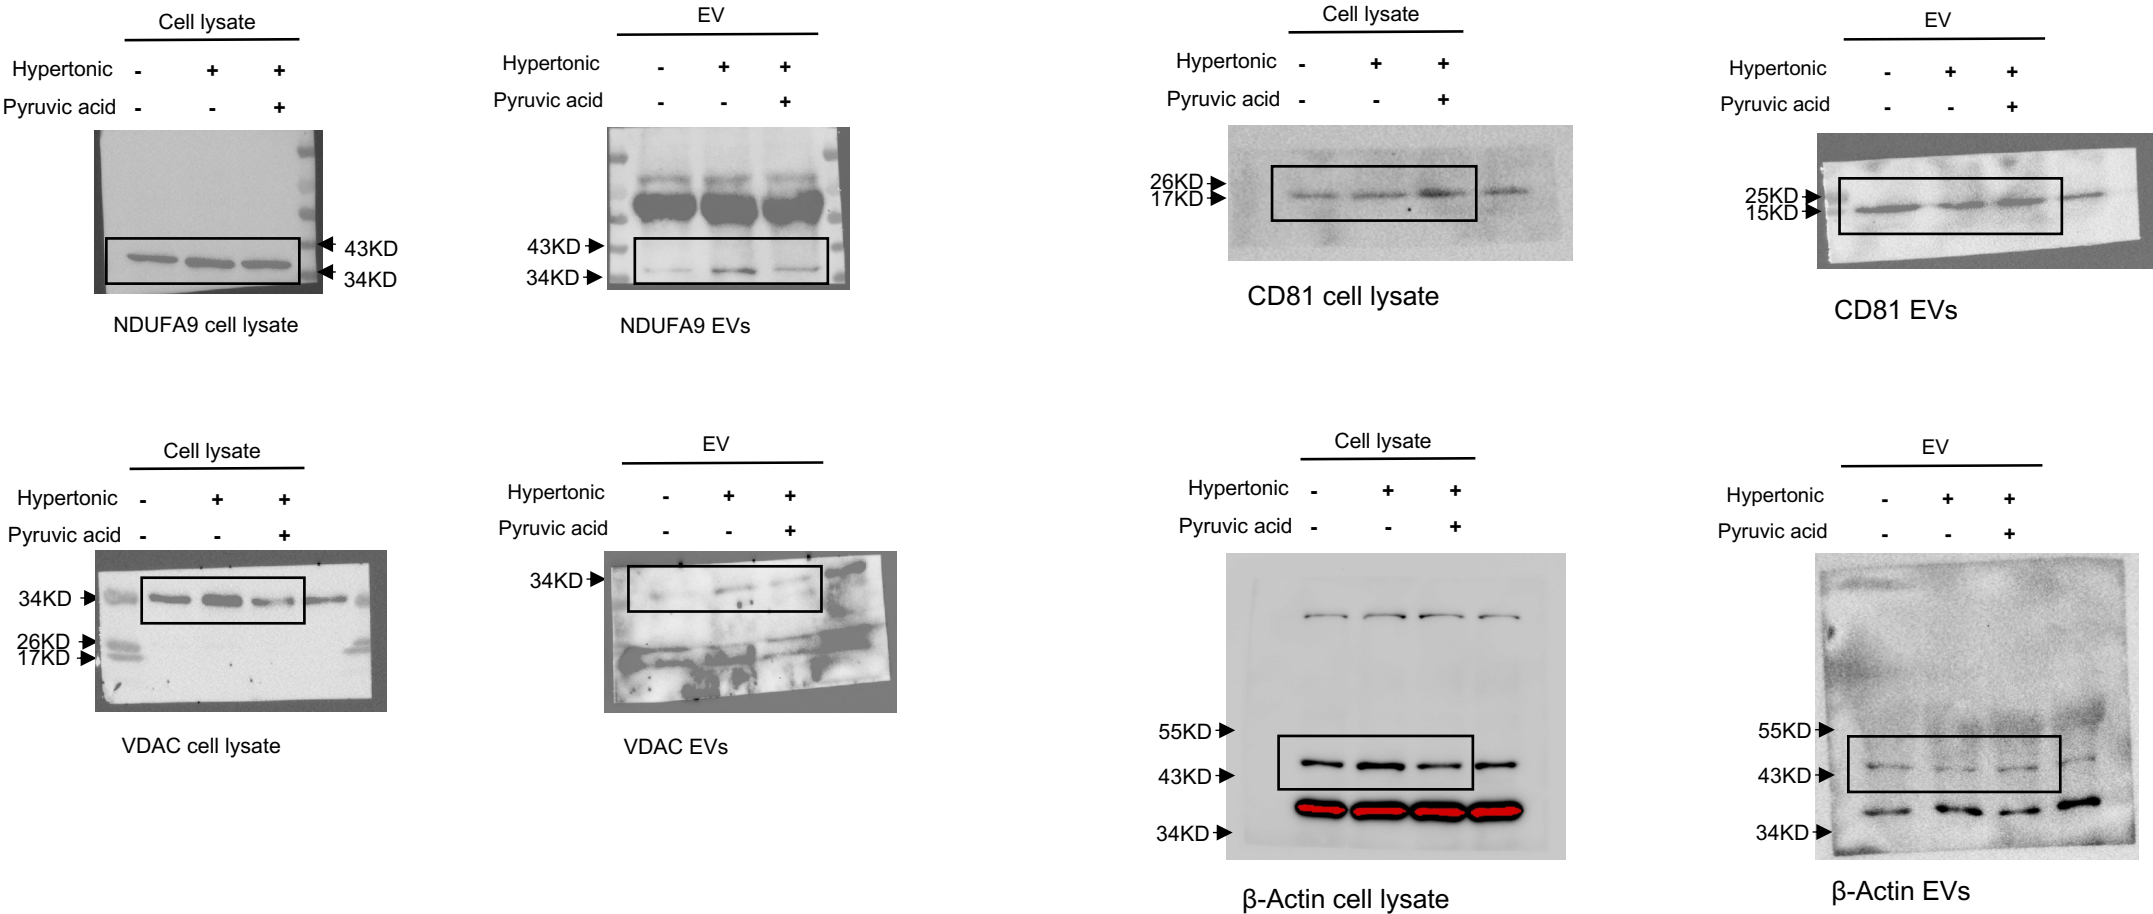

**Additional file 1.**

Original western blot gels of Fig. 2H for cell lysates and EVs of 3T3-L1 adipocytes following indicated treatments were subject to immunoblot analyses of the indicated proteins, respectively.

Figure 4B

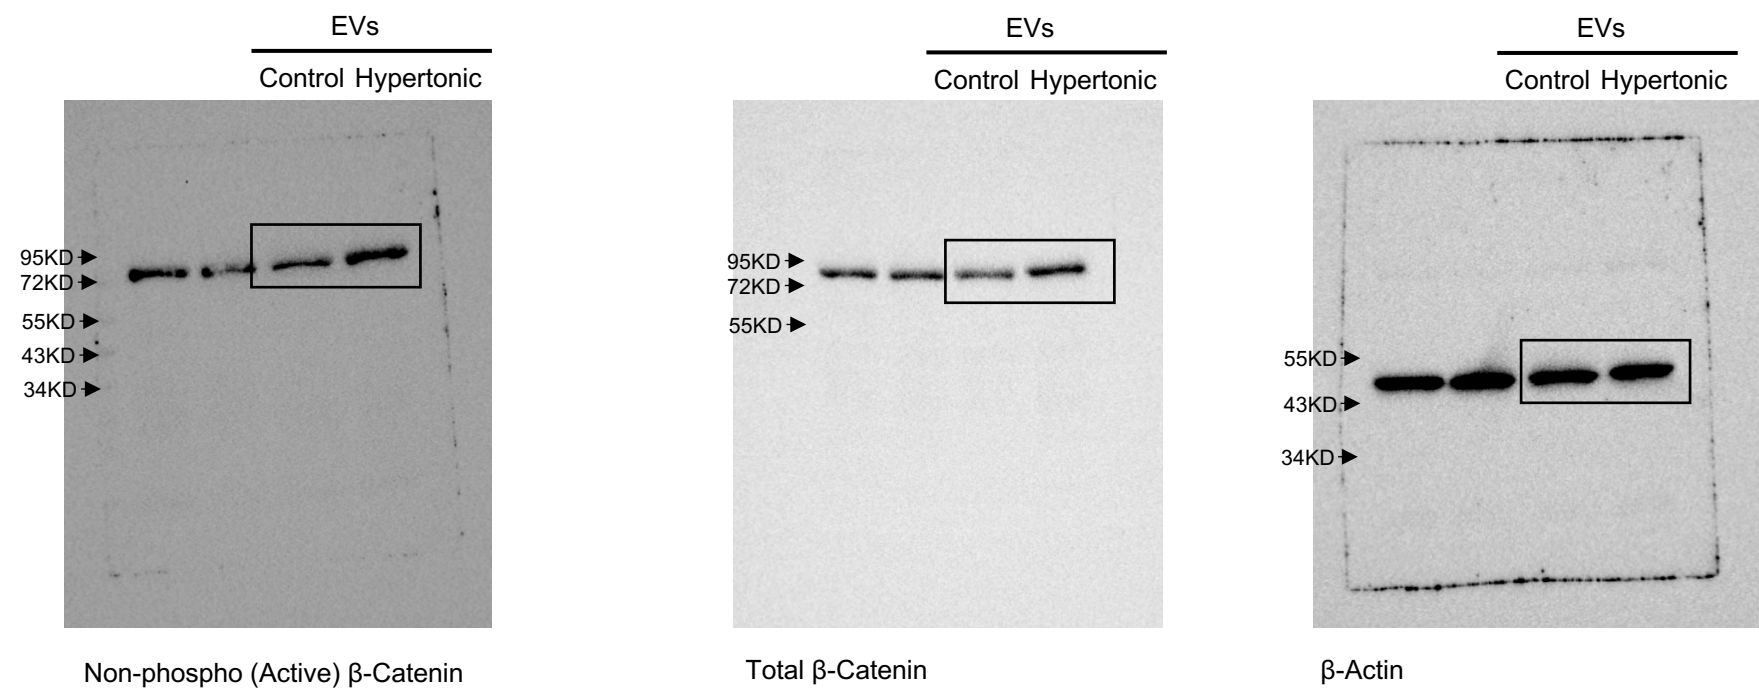

**Additional file 2.**

Original western blot gels of Fig. 4B for total cell lysates from 3T3-L1 adipocytes treated by EVs from isotonic or hypertonic adipocyte cultures were subject to western blot analyses of indicated proteins.

Figure 4C

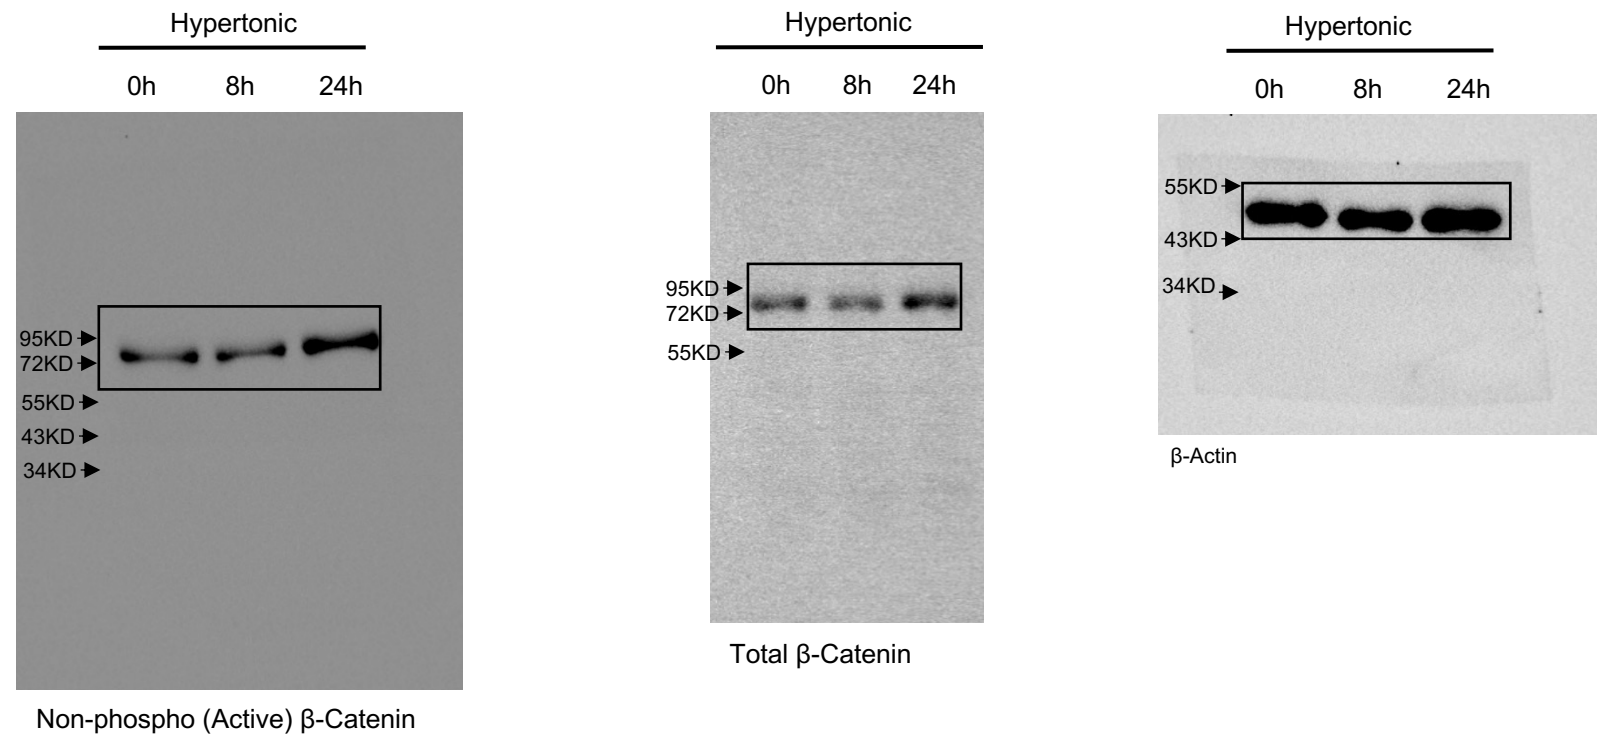

**Additional file 3.**

Original western blot gels of Fig. 4C for total cell lysates from 3T3-L1 adipocytes in indicated culture conditions were subject to western blot analyses of indicated proteins.

Figure 4F

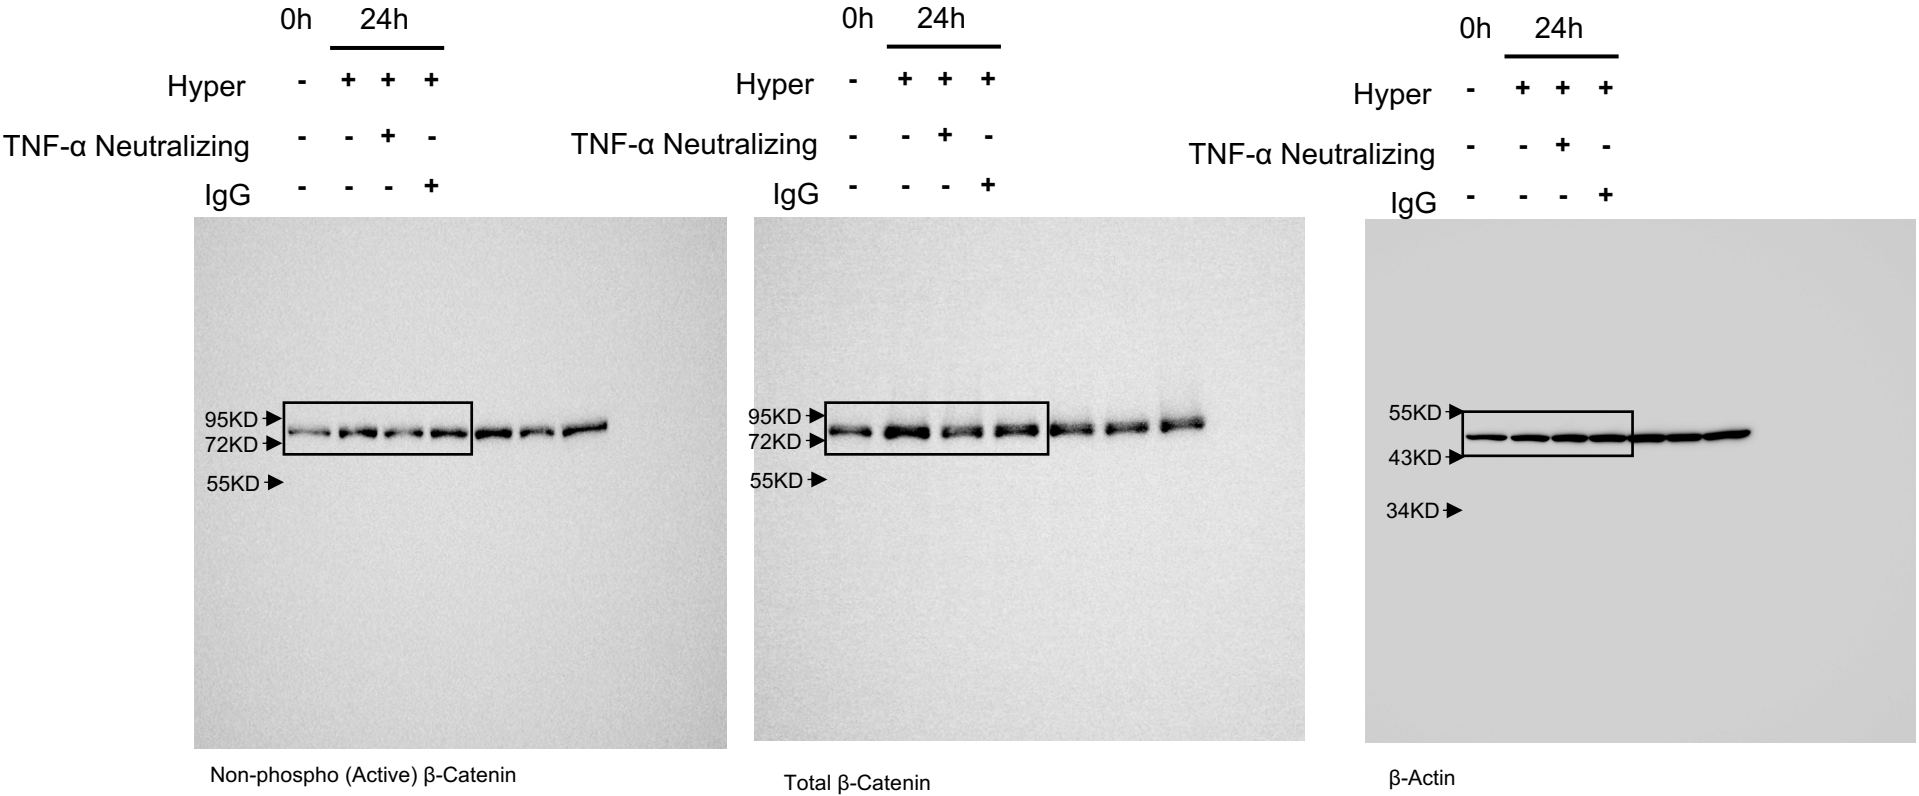

**Additional file 4.**

Original western blot gels of Fig. 4F for 3T3-L1 adipocytes were treated with the indicated conditions for 24 hours and the cell lysates were subject to western blot analysis of indicated proteins.

Supplementary Fig. 2.

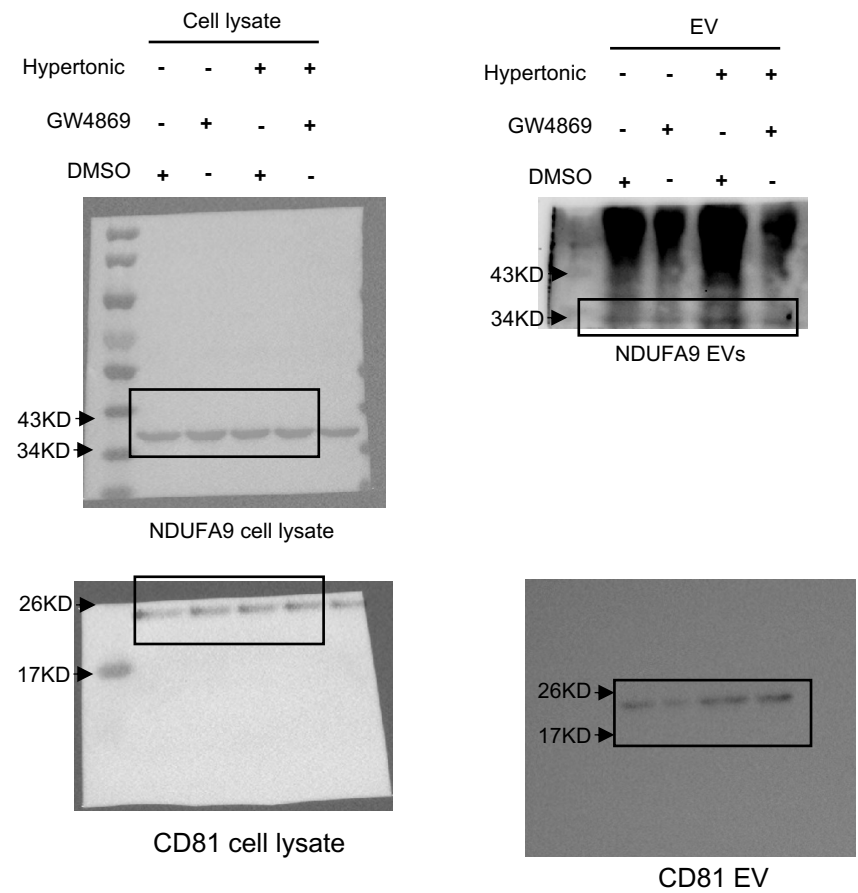

**Additional file 5.**

Original western blot gels of supplementary Fig. 4. for 3T3-L1 adipocytes were treated with the indicated conditions and the cell lysates and EVs were subject to western blot analysis of indicated proteins
